# Supplementary material for: High Visceral and Low Abdominal Subcutaneous Fat Stores in the Obese Adolescent
Source: Oxford University Press journal article supplement (doi:10.2337/db07-0932), 2007-11-01
Supplement: db070932onlineappendixfigure.doc [file db070932onlineappendixfigure.doc]

# APPENDIX

**FIGURE 3.** Schematic representation of the proposed interactions between relative levels of visceral and subcutaneous fat, lipid deposition in the liver and muscle, and leptin and adiponectin levels.
